# Supplementary material for: Uncovering circuit mechanisms of current sinks and sources with biophysical simulations of primary visual cortex
Source: eLife journal article supplement (doi:10.7554/elife.87169), 2023-07-24

A

Population contributions to the CSD for  
model w/inh. syns. removed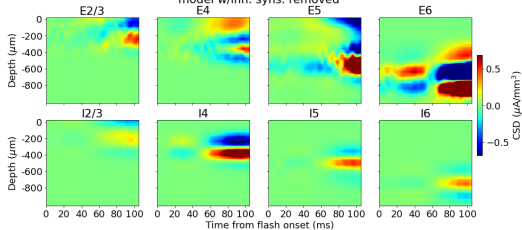

B

Laminar population firing rates

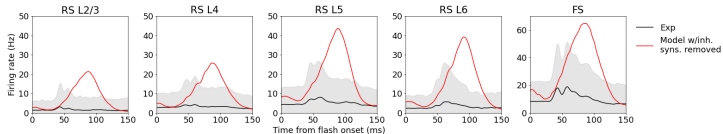

Supplement: supp [file elife-87169-supp-v1.zip]
