# Supplementary material for: Uncovering circuit mechanisms of current sinks and sources with biophysical simulations of primary visual cortex
Source: eLife journal article supplement (doi:10.7554/elife.87169), 2023-07-24

**A**

PC 1,  
expl. variance = 50.4 %

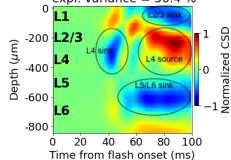**B**

CSD of final model  
w/feedback and Ign

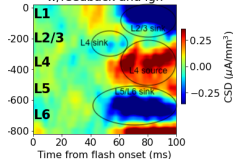**C**

CSD of final model with  
FB turned off at 60 ms

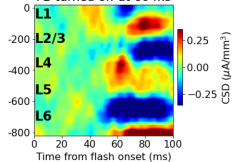**D**

Laminar population firing rates

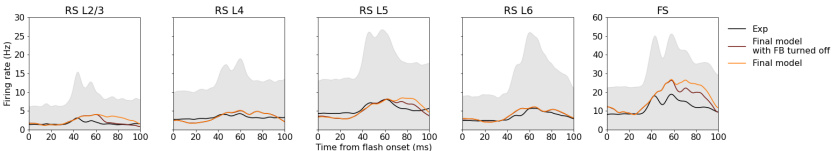

Supplement: supp [file elife-87169-supp-v1.zip]
