# Supplementary material for: Uncovering circuit mechanisms of current sinks and sources with biophysical simulations of primary visual cortex
Source: eLife journal article supplement (doi:10.7554/elife.87169), 2023-07-24
Supplement: supp [file elife-87169-supp-v1.zip]

**A**

RS L2/3 to RS L4

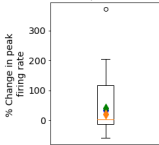**B**

RS L4 to RS L5

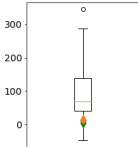**C**

RS L5 to RS L6

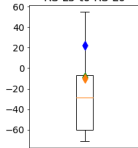**D**

RS to FS

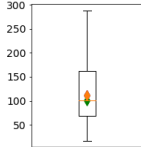

- Original model
- Model w/adjusted syn. weights
- Final model w/feedback and LGN
