# Supplementary material for: Uncovering circuit mechanisms of current sinks and sources with biophysical simulations of primary visual cortex
Source: eLife journal article supplement (doi:10.7554/elife.87169), 2023-07-24

# I4 contributions to the CSD

Original orientation  
of L4 inh. cells

Scrambled orientation  
of L4 inh. cells

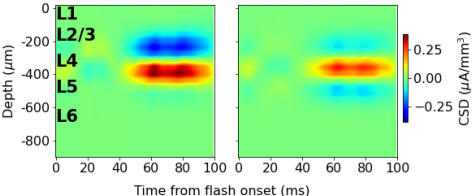

Supplement: supp [file elife-87169-supp-v1.zip]
