# Supplementary figures and images for: Uncovering circuit mechanisms of current sinks and sources with biophysical simulations of primary visual cortex
Source: eLife journal article supplement (doi:10.7554/elife.87169), 2023-07-24

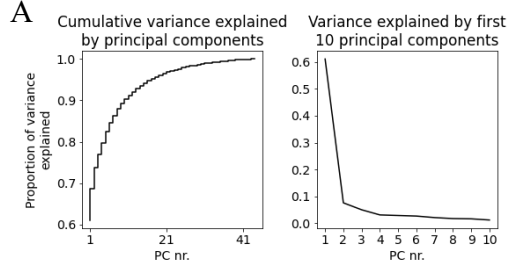

**B**

CSD of first 10 Principal Components; CSD aligned to landmarks

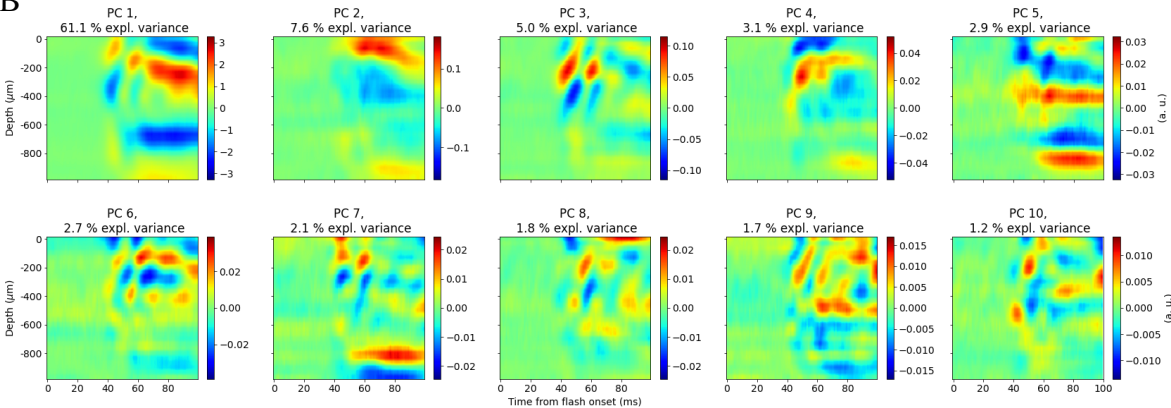

Supplement: supp [file elife-87169-supp-v1.zip]

**A**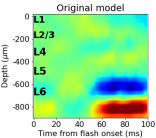**B**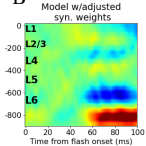**C**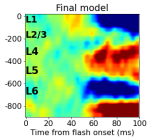**D**

WD between animals and  
between model versions

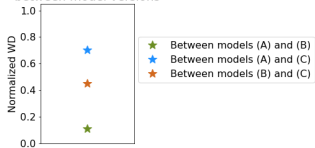

Supplement: supp [file elife-87169-supp-v1.zip]

# E5 contributions to the CSD

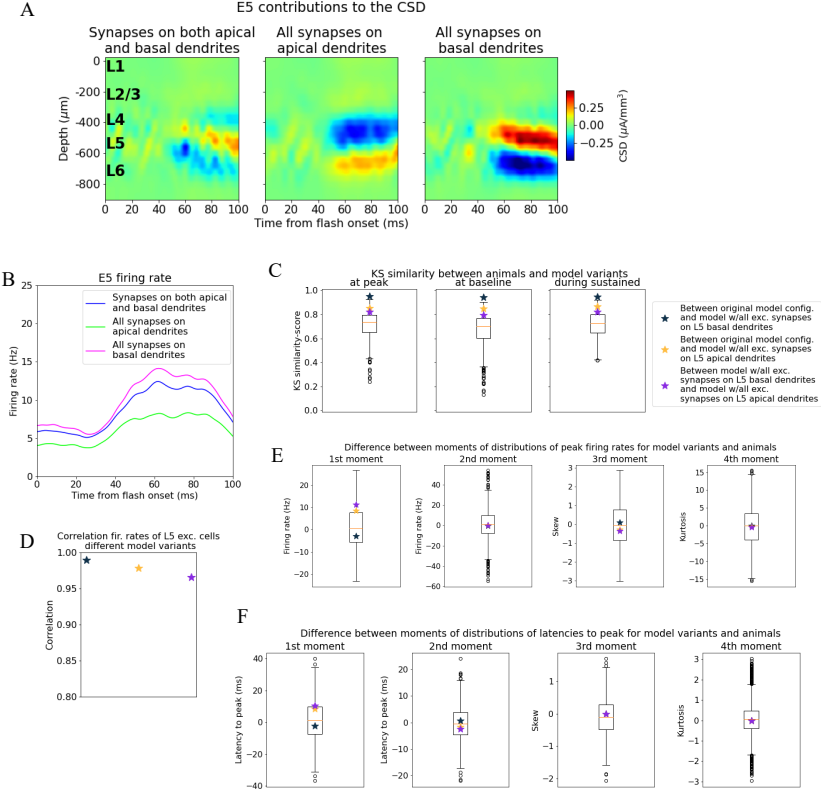

Supplement: supp [file elife-87169-supp-v1.zip]

A

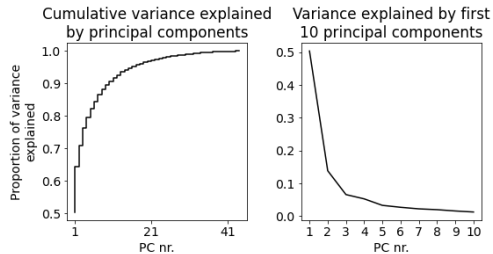

B

CSD of first 10 Principal Components; CSD aligned to histology

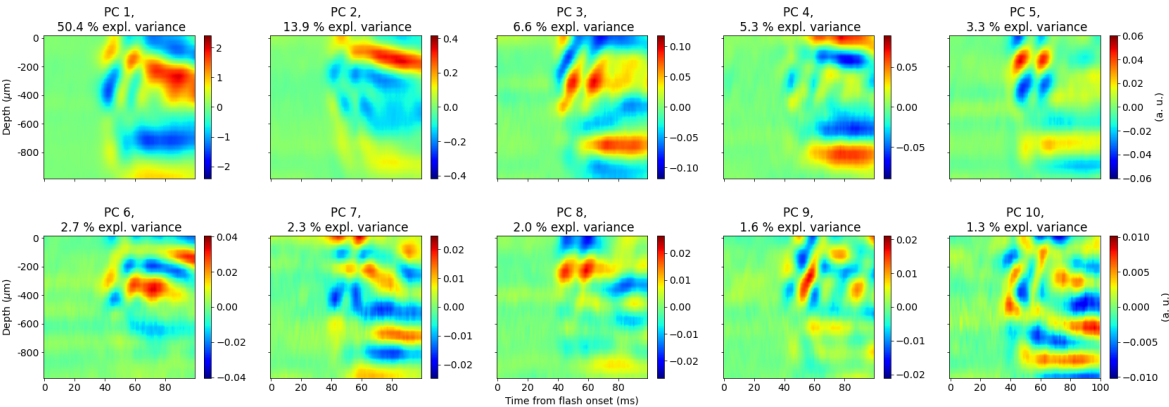

Supplement: supp [file elife-87169-supp-v1.zip]

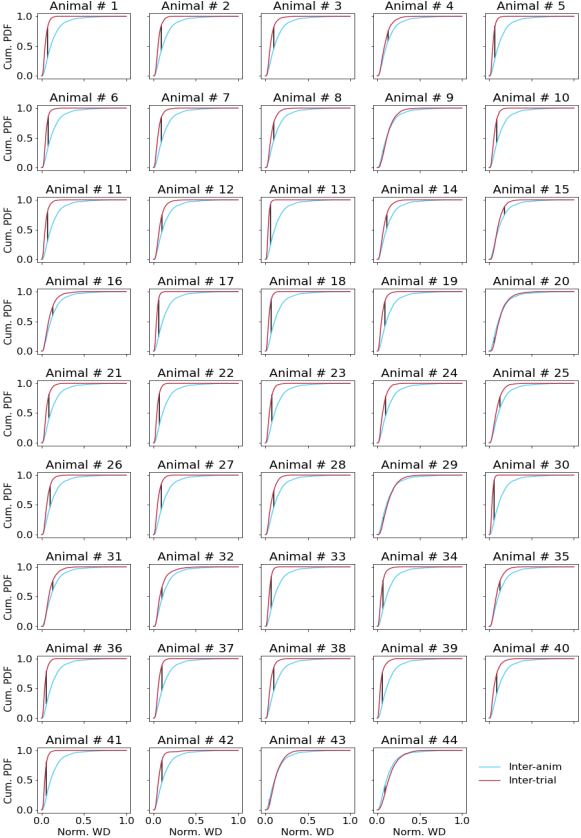

Supplement: supp [file elife-87169-supp-v1.zip]

# E6 contribution to the CSD

Original placement  
of exc. syns.

Exc. syns.  $< 150\ \mu\text{m}$   
of soma

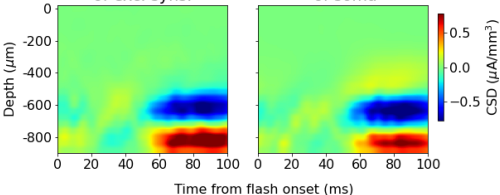

Supplement: supp [file elife-87169-supp-v1.zip]

# E23 contributions to the CSD

A

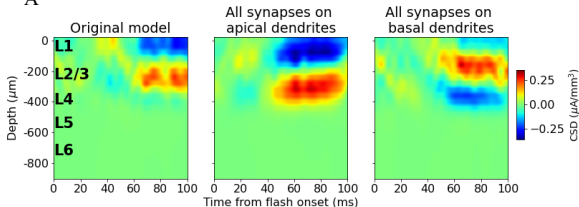

B

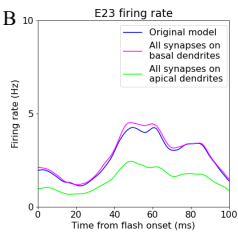

C

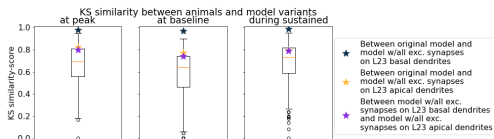

E

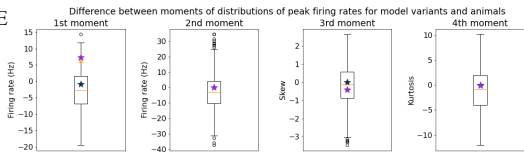

D

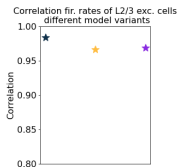

F

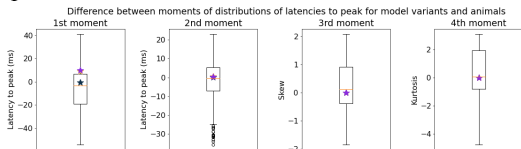

Supplement: supp [file elife-87169-supp-v1.zip]

LGN

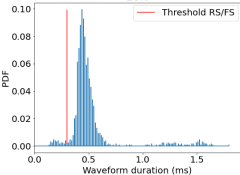

V1

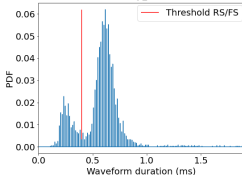

LM

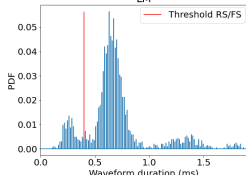

Supplement: supp [file elife-87169-supp-v1.zip]

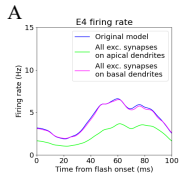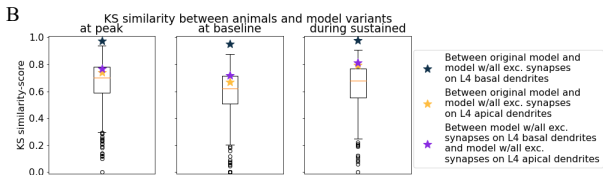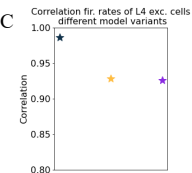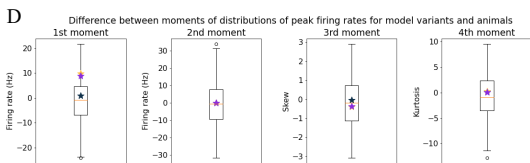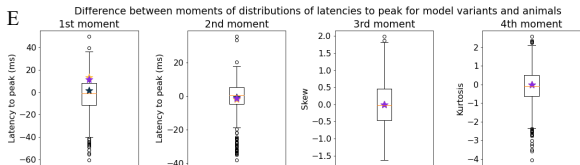

Supplement: supp [file elife-87169-supp-v1.zip]

Number of cells in each population  
in individual animals

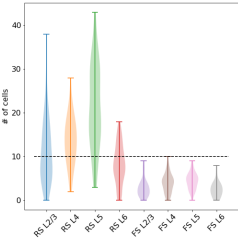

Number of FS cells  
all layers in V1

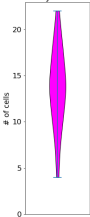

Supplement: supp [file elife-87169-supp-v1.zip]

A

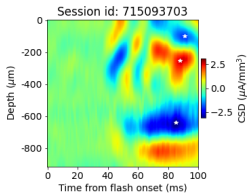

B

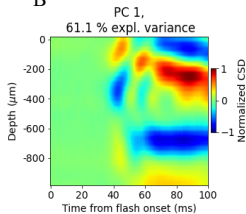

WD from model CSD  
to experimental PC 1 CSD

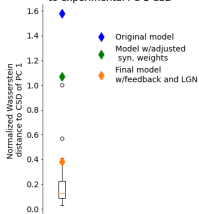

C

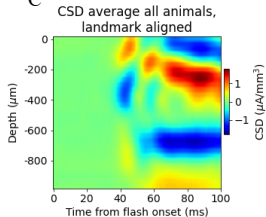

WD from model CSD  
to experimental average CSD

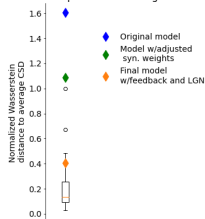

Supplement: supp [file elife-87169-supp-v1.zip]

A

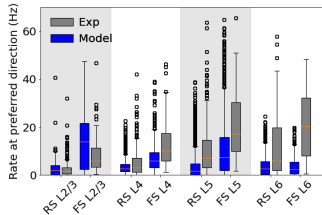

B

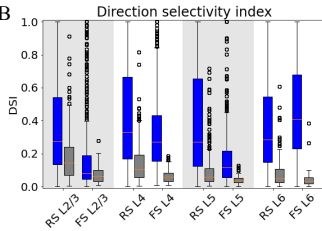

C

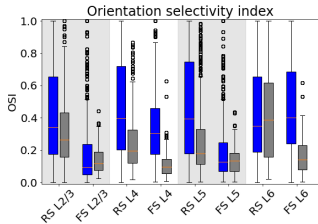

Supplement: supp [file elife-87169-supp-v1.zip]

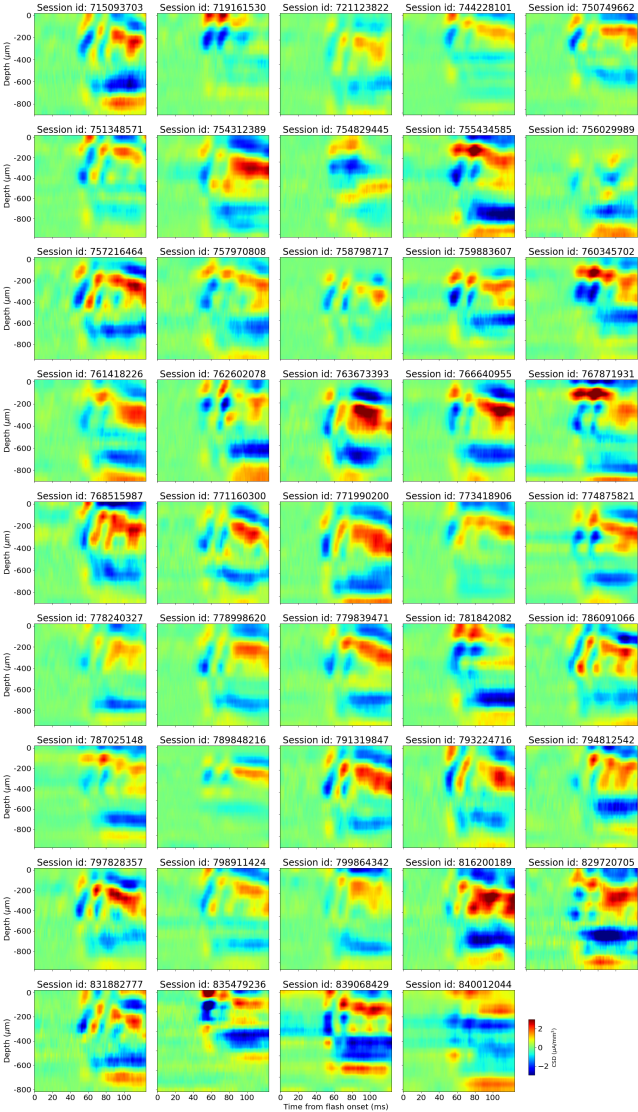

Supplement: supp [file elife-87169-supp-v1.zip]

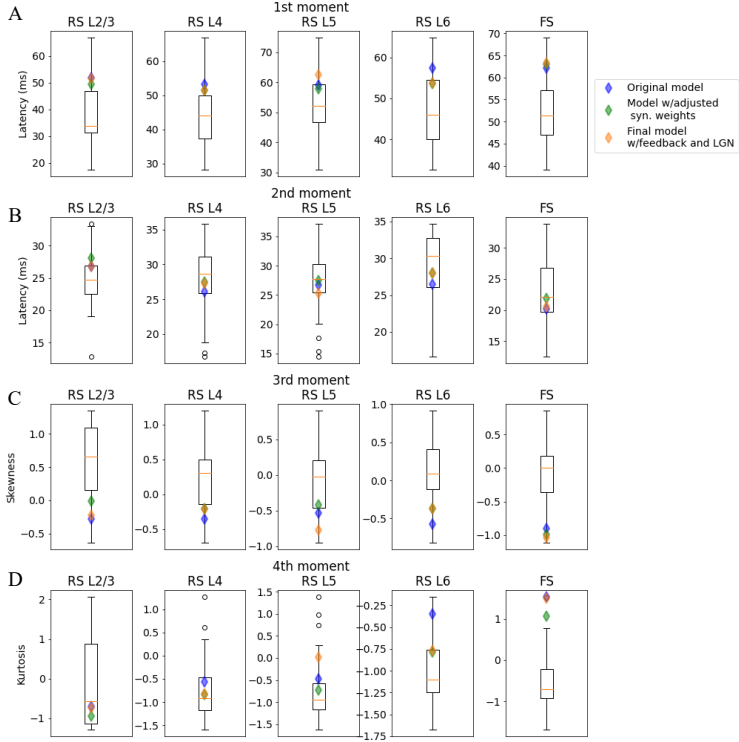

Supplement: supp [file elife-87169-supp-v1.zip]

# Laminar population firing rates

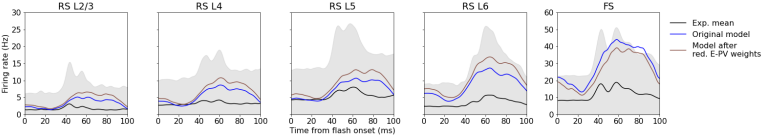

Supplement: supp [file elife-87169-supp-v1.zip]

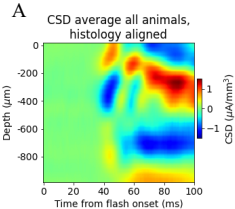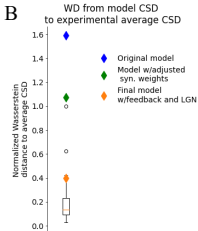

Supplement: supp [file elife-87169-supp-v1.zip]

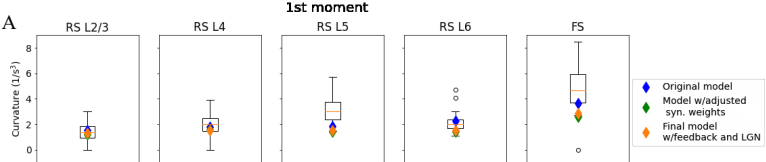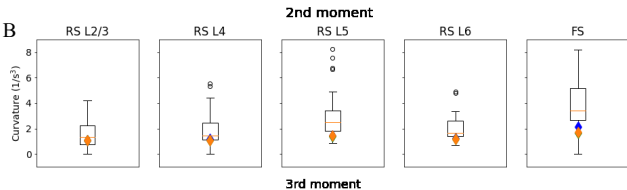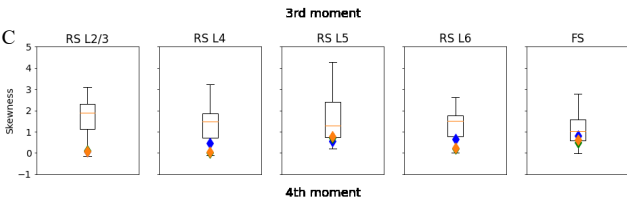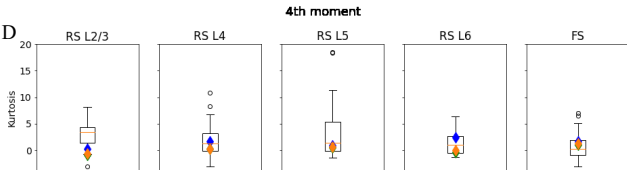

Supplement: supp [file elife-87169-supp-v1.zip]

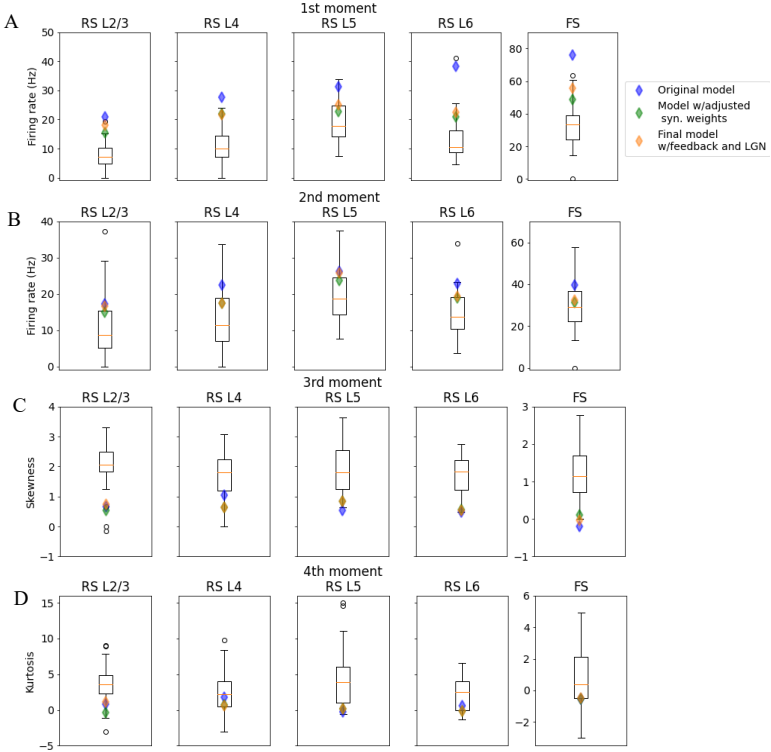

Supplement: supp [file elife-87169-supp-v1.zip]
